# Supplementary material for: Systematic phase control of periodic mesoporous organosilicas using Gemini surfactants
Source: Royal Society of Chemistry journal article supplement (doi:10.1039/b507225e), 2005-01-01
Supplement: b507225e.pdf [file b507225e.pdf]

## Systematic phase control of periodic mesoporous organosilicas using gemini surfactants

Hyung Ik Lee, Chanho Pak, Seung Hwan Yi, Jeong Kuk Shon, Sung Soo Kim, Byung Guk So, Hyuk Chang, Jae Eui Yie, Young-Uk Kwon and Ji Man Kim\*

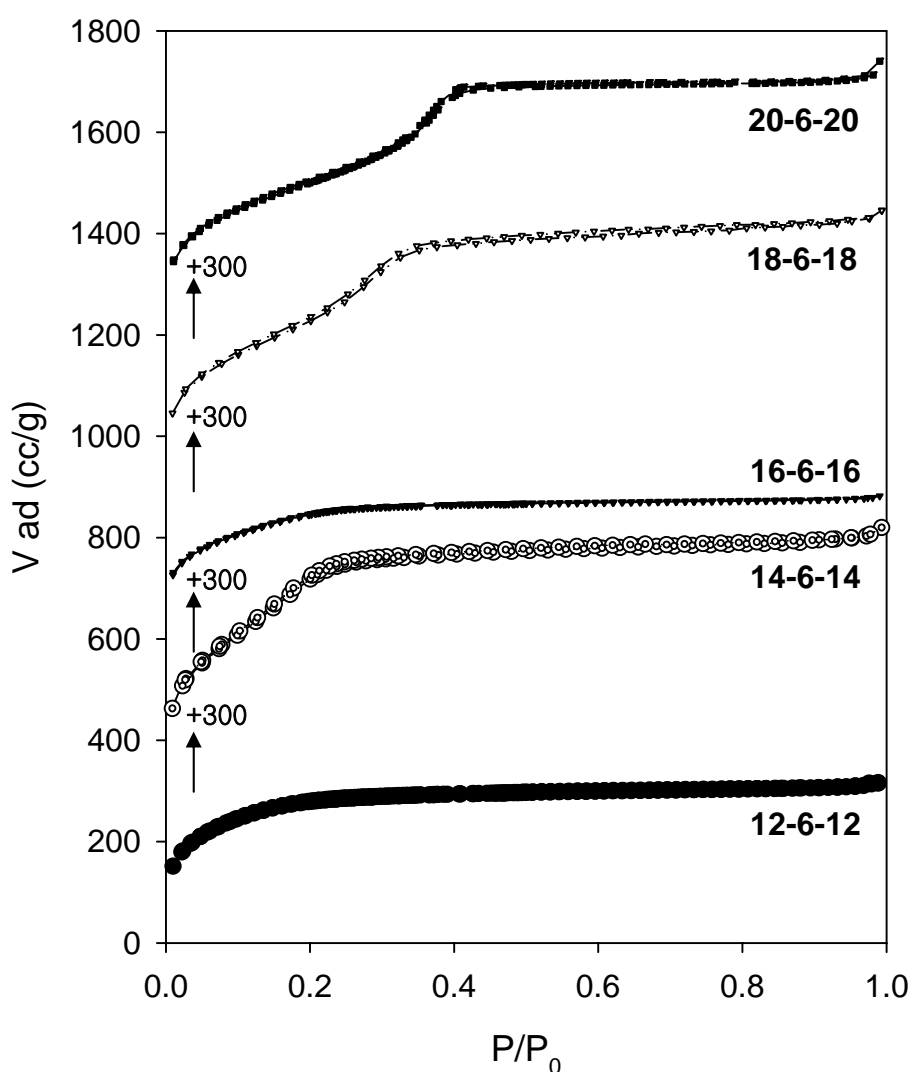

Figure S1 Nitrogen adsorption-desorption isotherms for the PMO materials in Fig. 1.
